# Supplementary material for: Synthesis, XRD and DFT studies on Pb[ChCN] 2 (Ch = O, S, Se) and Pb[SeCN][OH]
Source: Royal Society of Chemistry journal article supplement (doi:10.1039/d4dt02830a), 2024-11-14
Supplement: d4dt02830a1.pdf [file d4dt02830a1.pdf]

**Electronic Supporting Information (ESI)**

**Syntheses, XRD- and DFT studies on Pb[ChCN]<sub>2</sub> (Ch=O, S, Se) and Pb[SeCN][OH]**

Alena Shlyaykher<sup>a</sup>, Aleksandar Zivkovic<sup>b</sup>, Hennes Günther<sup>a</sup>, Anna Lea Barba<sup>a</sup>, Nora H. de Leeuw<sup>b</sup>, and Frank Tambornino<sup>\*a</sup>

Email: [Frank.Tambornino@chemie.uni-marburg.de](mailto:Frank.Tambornino@chemie.uni-marburg.de)

---

<sup>a</sup>Philipps-Universität Marburg, Hans-Meerwein Straße 4, Marburg, DE-35032.

<sup>b</sup>Department of Earth Sciences, Utrecht University, 3548CB Utrecht, The Netherlands;

<sup>c</sup>Institute of Inorganic Chemistry, Christian-Albrecht University of Kiel, 24118 Kiel, Germany.

**Contents**

|                                                            |   |
|------------------------------------------------------------|---|
| 1. Further details on quantum mechanical calculations..... | 2 |
| 2. Collected Raman spectra .....                           | 4 |
| 3. Additional crystallographic details .....               | 6 |

## 1. Further details on quantum mechanical calculations

**Table S1:** Calculated and experimental Raman frequencies and intensities of Pb[SeCN]<sub>2</sub>, Pb[SeCN][OH], and Pb[OCN]<sub>2</sub>.

| Pb[SeCN] <sub>2</sub> |         |         |      | Pb[SeCN][OH] |         |         |      | Pb[OCN] <sub>2</sub> |         |         |      |
|-----------------------|---------|---------|------|--------------|---------|---------|------|----------------------|---------|---------|------|
| Symm                  | Calc. v | Calc. I | Exp  | Symm         | Calc. v | Calc. I | Exp  | Symm                 | Calc. v | Calc. I | Exp  |
| B2g                   | 27      | 84      |      | Ag           | 46      | 202     |      | B1g                  | 31      | 280     |      |
| B1g                   | 29      | 1       |      | B3g          | 48      | 125     |      | B2g                  | 37      | 7       |      |
| Ag                    | 34      | 630     |      | B1g          | 50      | 183     |      | Ag                   | 59      | 143     |      |
| Ag                    | 49      | 136     |      | B2g          | 59      | 983     |      | Ag                   | 72      | 105     |      |
| B3g                   | 54      | 1       |      | B1g          | 70      | 236     |      | B3g                  | 77      | 48      |      |
| B3g                   | 74      | 47      |      | B2g          | 74      | 357     |      | B1g                  | 108     | 62      |      |
| Ag                    | 81      | 198     |      | Ag           | 82      | 199     |      | B3g                  | 109     | 29      |      |
| B1g                   | 85      | 152     |      | B3g          | 83      | 0       |      | Ag                   | 116     | 686     |      |
| B2g                   | 86      | 421     |      | Ag           | 94      | 787     | 74   | B2g                  | 126     | 29      |      |
| B3g                   | 89      | 93      |      | B3g          | 107     | 44      |      | B1g                  | 139     | 10      |      |
| B1g                   | 89      | 6       |      | Ag           | 113     | 1000    | 99   | B3g                  | 139     | 14      |      |
| B2g                   | 95      | 5       |      | B3g          | 120     | 64      |      | B2g                  | 141     | 14      |      |
| Ag                    | 105     | 925     | 89   | B2g          | 122     | 605     |      | Ag                   | 144     | 1000    | 100  |
| B3g                   | 112     | 383     |      | B1g          | 122     | 330     |      | B3g                  | 149     | 27      |      |
| Ag                    | 116     | 679     | 132  | Ag           | 149     | 856     | 129  | B3g                  | 154     | 67      |      |
| B3g                   | 127     | 11      |      | B3g          | 158     | 48      |      | B2g                  | 169     | 228     | 125  |
| B1g                   | 127     | 154     |      | B3g          | 279     | 12      |      | Ag                   | 173     | 25      |      |
| B3g                   | 130     | 205     |      | Ag           | 280     | 128     | 255  | B1g                  | 178     | 15      |      |
| Ag                    | 132     | 318     |      | B2g          | 295     | 13      |      | B3g                  | 181     | 77      |      |
| B2g                   | 134     | 39      |      | B1g          | 296     | 33      |      | Ag                   | 186     | 137     |      |
| Ag                    | 160     | 324     |      | Ag           | 331     | 291     | 331  | Ag                   | 206     | 266     | 149  |
| B2g                   | 169     | 30      |      | B3g          | 333     | 2       |      | B2g                  | 206     | 159     |      |
| B1g                   | 173     | 437     |      | B2g          | 406     | 1       |      | B3g                  | 215     | 94      |      |
| B3g                   | 181     | 2       |      | B1g          | 408     | 4       |      | B1g                  | 216     | 368     | 207  |
| B3g                   | 195     | 149     |      | B3g          | 416     | 1       |      | Ag                   | 236     | 109     |      |
| Ag                    | 204     | 258     |      | Ag           | 417     | 12      | 401  | B3g                  | 316     | 15      |      |
| B1g                   | 396     | 8       |      | B3g          | 585     | 6       |      | Ag                   | 638     | 40      | 611  |
| B2g                   | 398     | 0       |      | Ag           | 593     | 89      | 563  | B3g                  | 643     | 1       |      |
| B3g                   | 407     | 3       |      | B1g          | 616     | 3       |      | B2g                  | 644     | 1       |      |
| Ag                    | 409     | 3       |      | B2g          | 617     | 24      |      | B1g                  | 646     | 4       |      |
| Ag                    | 415     | 40      | 405  | Ag           | 735     | 29      |      | B1g                  | 651     | 3       |      |
| B2g                   | 416     | 0       |      | B3g          | 757     | 83      | 794  | Ag                   | 653     | 11      | 630  |
| B1g                   | 420     | 9       |      | Ag           | 2181    | 464     | 2095 | B2g                  | 654     | 5       |      |
| B3g                   | 421     | 0       |      | B3g          | 2184    | 539     |      | B3g                  | 656     | 0       |      |
| B3g                   | 567     | 13      |      | Ag           | 3712    | 147     | 3531 | Ag                   | 1309    | 19      |      |
| Ag                    | 567     | 68      | 557  | B3g          | 3713    | 8       | 3677 | B3g                  | 1312    | 0       |      |
| B3g                   | 616     | 5       |      |              |         |         |      | B3g                  | 1328    | 69      |      |
| Ag                    | 618     | 16      |      |              |         |         |      | Ag                   | 1340    | 399     | 1319 |
| Ag                    | 2159    | 1000    | 2105 |              |         |         |      | Ag                   | 2191    | 96      | 2090 |
| B3g                   | 2169    | 1       |      |              |         |         |      | B3g                  | 2210    | 83      | 2113 |
| Ag                    | 2224    | 394     | 2149 |              |         |         |      | Ag                   | 2230    | 269     | 2131 |
| B3g                   | 2224    | 182     |      |              |         |         |      | B3g                  | 2308    | 0       |      |

**Table S2:** Calculated and experimental Raman properties of Pb[SCN]<sub>2</sub>.

| <b>Pb[SCN]<sub>2</sub></b> |                |                |             |
|----------------------------|----------------|----------------|-------------|
| <b>Symm</b>                | <b>Calc. v</b> | <b>Calc. I</b> | <b>Exp</b>  |
| Bg                         | 31             | 195            |             |
| Ag                         | 48             | 350            |             |
| Bg                         | 87             | 291            | <b>76</b>   |
| Ag                         | 93             | 265            |             |
| Bg                         | 96             | 430            |             |
| Bg                         | 114            | 500            | <b>104</b>  |
| Ag                         | 126            | 180            |             |
| Bg                         | 142            | 319            |             |
| Ag                         | 158            | 712            |             |
| Ag                         | 165            | 1000           | <b>156</b>  |
| Bg                         | 167            | 26             |             |
| Bg                         | 190            | 202            |             |
| Ag                         | 209            | 410            |             |
| Bg                         | 475            | 3              |             |
| Ag                         | 489            | 4              |             |
| Ag                         | 491            | 15             | <b>480</b>  |
| Bg                         | 493            | 9              |             |
| Ag                         | 783            | 97             | <b>759</b>  |
| Bg                         | 785            | 9              |             |
| Ag                         | 2107           | 730            | <b>2034</b> |
| Bg                         | 2109           | 600            |             |

## 2. Collected Raman spectra

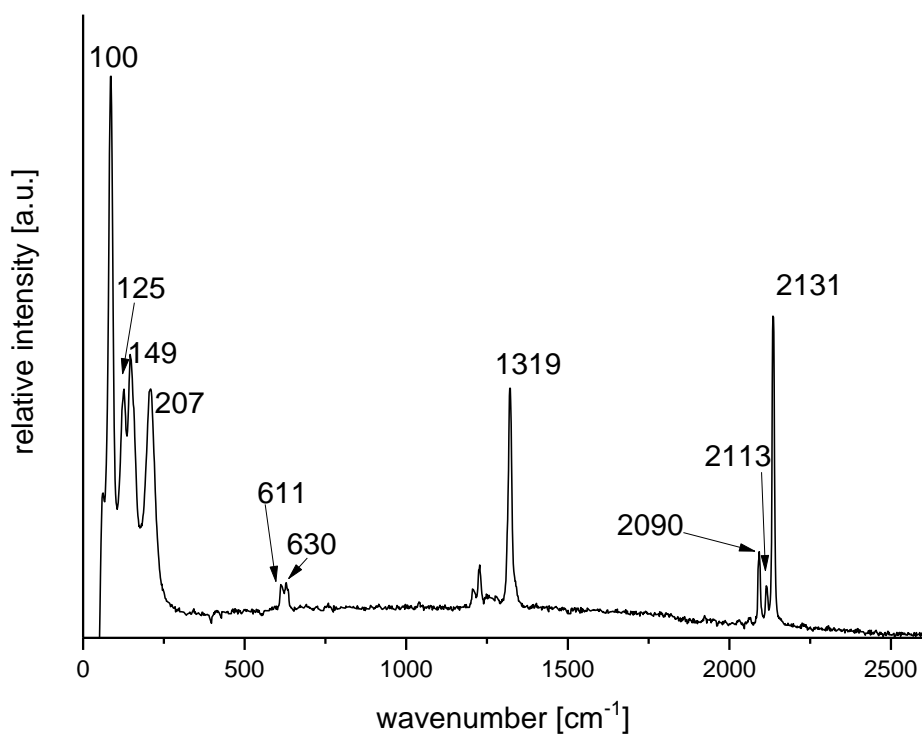

**Figure S1:** Raman spectrum of Pb[OCN]<sub>2</sub> collected on microcrystalline powder with 633 nm laser at room temperature.

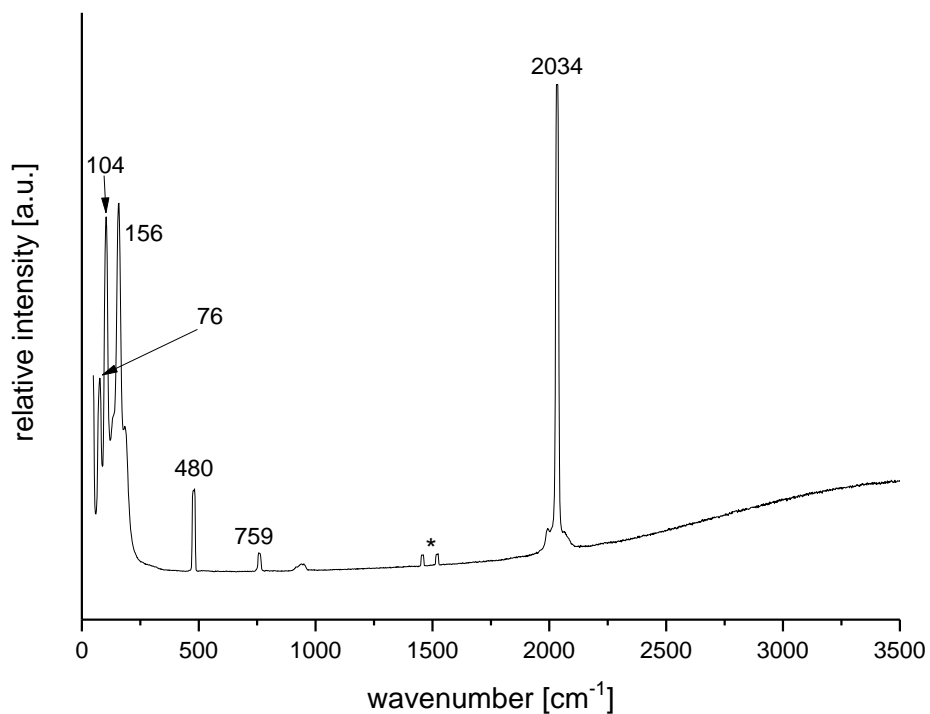

**Figure S2:** Raman spectrum of Pb[SCN]<sub>2</sub> collected on microcrystalline powder with 532 nm laser at room temperature. \*: satellites caused by equipment construction.

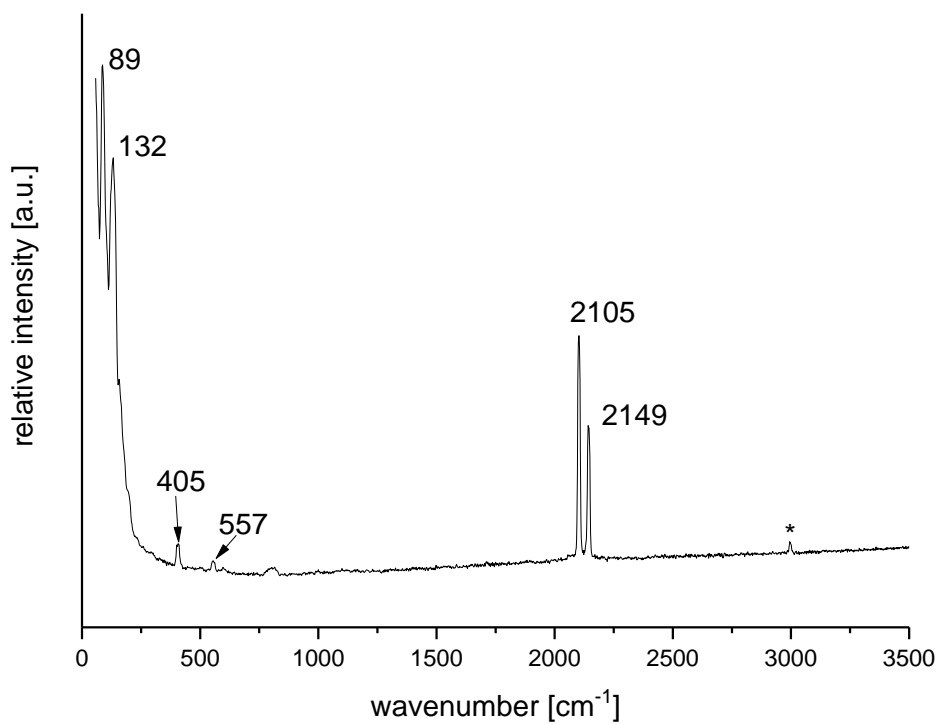

**Figure S3:** Raman spectrum of  $\text{Pb}[\text{SeCN}]_2$  collected on single crystal with 532 nm laser at room temperature. \*: impurity of  $\text{Pb}[\text{SeCN}][\text{OH}]$ .

### 3. Additional crystallographic details

**Table S3:** Selected powder X-ray diffraction data collection and refinement parameters for Pb[ChCN]<sub>2</sub> (Ch=O, Se), and Pb[SeCN][OH].

|                                | Pb[OCN] <sub>2</sub> <sup>[a, b]</sup> | Pb[SeCN] <sub>2</sub> <sup>[a, b]</sup> | Pb[SeCN][OH] <sup>[a, c]</sup> |
|--------------------------------|----------------------------------------|-----------------------------------------|--------------------------------|
| Formula                        | C2 N2 O2 Pb                            | C2 N2 Se2 Pb                            | C H N Se Pb                    |
| Fw / g mol <sup>-1</sup>       | 123.02                                 | 212.85                                  | 335.87                         |
| Crystal system                 | orthorhombic                           | orthorhombic                            | orthorhombic                   |
| Space group                    | <i>Pnma</i> (№ 62)                     | <i>Pnma</i> (№ 62)                      | <i>Pnma</i> (№ 62)             |
| <i>a</i> / Å                   | 8.62373(15)                            | 12.6574(5)                              | 8.66931(11)                    |
| <i>b</i> / Å                   | 3.98198(6)                             | 4.30312(13)                             | 4.19306(2)                     |
| <i>c</i> / Å                   | 11.72148(18)                           | 10.8393(3)                              | 11.65257(8)                    |
| <i>V</i> / Å <sup>3</sup>      | 402.509(11)                            | 90.38(3)                                | 423.582(6)                     |
| <i>Z</i>                       | 4                                      | 4                                       | 4                              |
| Radiation, λ / Å               | 1.54175                                | 1.54175                                 | 1.54175                        |
| T / K                          | 298(2)                                 | 298(2)                                  | 298(2)                         |
| <i>R</i> <sub>wp</sub> / %     | 7.51684316                             | 12.1849025                              | 10.1929528                     |
| <i>R</i> <sub>p</sub> / %      | 5.53611169                             | 8.92969863                              | 7.6677716                      |
| <i>R</i> <sub>Bragg</sub> / %  | 5.09365506                             | 4.4688295                               | 5.9381605                      |
| GoF                            | 1.35427749                             | 1.02617433                              | 1.09911186                     |
| Starting angle measured / ° 2θ | 5                                      | 5                                       | 5                              |
| Final angle measured / ° 2θ    | 90                                     | 90                                      | 90                             |
| Starting angle refined / ° 2θ  | 10                                     | 10                                      | 10                             |
| Final angle refined / ° 2θ     | 70                                     | 70                                      | 85                             |
| Step width / ° 2θ              | 0.015                                  | 0.015                                   | 0.015                          |
| Refined Parameters             | 39                                     | 51                                      | 54                             |
| Background Parameters          | 12                                     | 23                                      | 18                             |
| Profile Parameters             | 14 <sup>[b]</sup>                      | 10 <sup>[b]</sup>                       | 24 <sup>[c]</sup>              |

**[a]:** The starting model derived from single crystal X-ray data was used as starting point. [OCN]<sup>-</sup>, [SeCN]<sup>-</sup> and [OH]<sup>-</sup> anions were modelled as rigid bodies. Thermal expansion parameters for C and N were constrained to the same value. **[b]:** Profile parameters include preferred orientation refinement with spherical harmonics order 4. **[c]:** Profile parameters include preferred orientation refinement with spherical harmonics order 8.

**Table S4:** Selected single crystal X-ray data collection and refinement parameters for Pb[ChCN]<sub>2</sub> (Ch=O, S, Se), and Pb[SeCN][OH].

|                                                  | Pb[OCN] <sub>2</sub>                            | Pb[SCN] <sub>2</sub>                           | Pb[SeCN] <sub>2</sub>                           | Pb[SeCN][OH]    |
|--------------------------------------------------|-------------------------------------------------|------------------------------------------------|-------------------------------------------------|-----------------|
| Formula                                          | C <sub>2</sub> N <sub>2</sub> O <sub>2</sub> Pb | C <sub>2</sub> N <sub>2</sub> PbS <sub>2</sub> | C <sub>2</sub> N <sub>2</sub> PbSe <sub>2</sub> | C H N O Pb Se   |
| CCDC                                             | 2383820                                         | 2383821                                        | 2383822                                         | 2383823         |
| Fw / g mol <sup>-1</sup>                         | 291.23                                          | 323.35                                         | 417.15                                          | 329.18          |
| Crystal system                                   | orthorhombic                                    | monoclinic                                     | orthorhombic                                    | orthorhombic    |
| Space group                                      | <i>Pnma</i>                                     | <i>C2/c</i>                                    | <i>Pnma</i>                                     | <i>Pnma</i>     |
| <i>a</i> / Å                                     | 8.5689(18)                                      | 9.6128(9)                                      | 12.479(2)                                       | 8.6244(2)       |
| <i>b</i> / Å                                     | 3.9410(9)                                       | 6.5306(6)                                      | 4.2277(9)                                       | 4.1674(4)       |
| <i>c</i> / Å                                     | 16.660(3)                                       | 8.1913(7)                                      | 10.6523(17)                                     | 11.5412(6)      |
| $\beta$ / °                                      | —                                               | 92.734(7)                                      | —                                               | —               |
| <i>V</i> / Å <sup>3</sup>                        | 393.74(17)                                      | 513.64(8)                                      | 562.00(17)                                      | 414.81(5)       |
| <i>Z</i>                                         | 4                                               | 4                                              | 4                                               | 4               |
| Radiation, $\lambda$ / Å                         | 0.71073                                         | 0.71073                                        | 0.71073                                         | 0.71073         |
| Temp / K                                         | 100                                             | 100                                            | 100                                             | 180.15          |
| $\rho_{\text{calc}}$ / g cm <sup>-3</sup>        | 4.913                                           | 4.181                                          | 4.930                                           | 5.271           |
| $\mu$ / mm <sup>-1</sup>                         | 42.695                                          | 33.507                                         | 42.835                                          | 49.251          |
| Reflections collected                            | 6464                                            | 5951                                           | 12950                                           | 11581           |
| Ind. Reflins. / Ind. Reflins gt                  | 760 / 517                                       | 786 / 763                                      | 912 / 850                                       | 800 / 719       |
| Parameters                                       | 43                                              | 34                                             | 43                                              | 35              |
| $R_{\text{int}}$ / $R_{(\sigma)}$                | 0.0993 / 0.0643                                 | 0.0165 / 0.0084                                | 0.0855 / 0.0269                                 | 0.0473 / 0.0203 |
| $R1/wR2$ , <sup>[a]</sup> $I \geq 2\sigma I$ (%) | 0.0415 / 0.0931                                 | 0.0124 / 0.0303                                | 0.0377 / 0.0935                                 | 0.0232 / 0.0551 |
| $R1/wR2$ , <sup>[a]</sup> all data (%)           | 0.0641 / 0.0970                                 | 0.0130 / 0.0304                                | 0.0397 / 0.0948                                 | 0.0268 / 0.0555 |
| GOF                                              | 0.89980                                         | 1.16785                                        | 1.142                                           | 1.08358         |
| Twin law                                         | —                                               | —                                              | —                                               | —               |
| BASF                                             | —                                               | —                                              | —                                               | —               |
| Flack parameter                                  | —                                               | —                                              | —                                               | —               |

<sup>[a]</sup>  $R1 = [\sum(|F_o| - |F_c|)] / \sum|F_o|$ ;  $wR2 = \{[\sum w[(F_o)^2 - (F_c)^2]^2] / [\sum w(F_o)^2]\}^{1/2}$ ;  $w = [\sigma^2(F_o)^2 + (AP)^2 + BP]^{-1}$ , where  $P = [(F_o)^2 + 2(F_c)^2] / 3$  and the A and B values are 0.0610 and 0 for Pb[OCN]<sub>2</sub>; 0.0219 and 0 for Pb[SCN]<sub>2</sub>; 0.0387 and 0 for Pb[SeCN][OH]; 0.0684 and 0 Pb[SeCN]<sub>2</sub>.

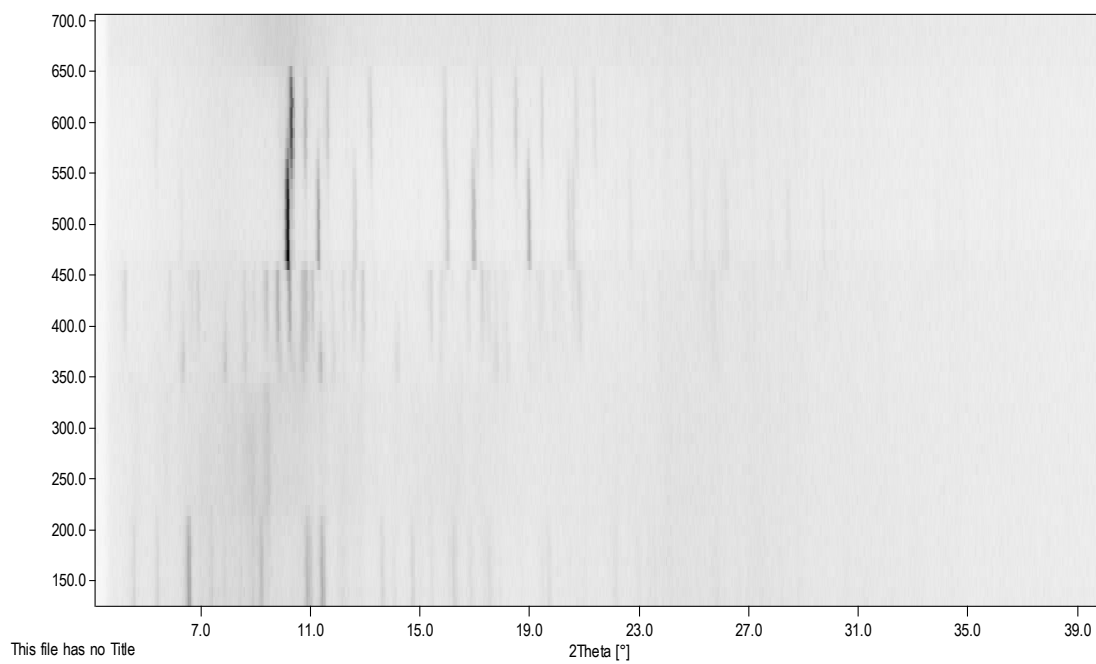

**Figure S4:** Temperature depended powder X-ray diffraction of  $\text{Pb}[\text{OCN}]_2$ .

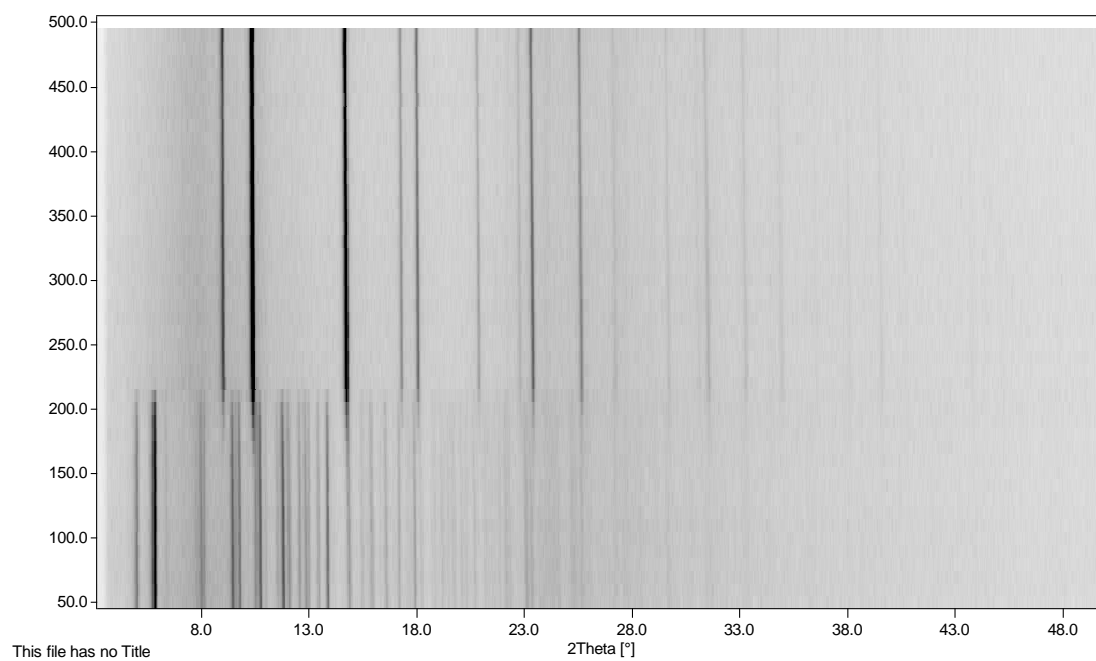

**Figure S5:** Temperature depended powder X-ray diffraction of  $\text{Pb}[\text{SeCN}]_2$ .



#### 4. UV-Vis spectroscopic data

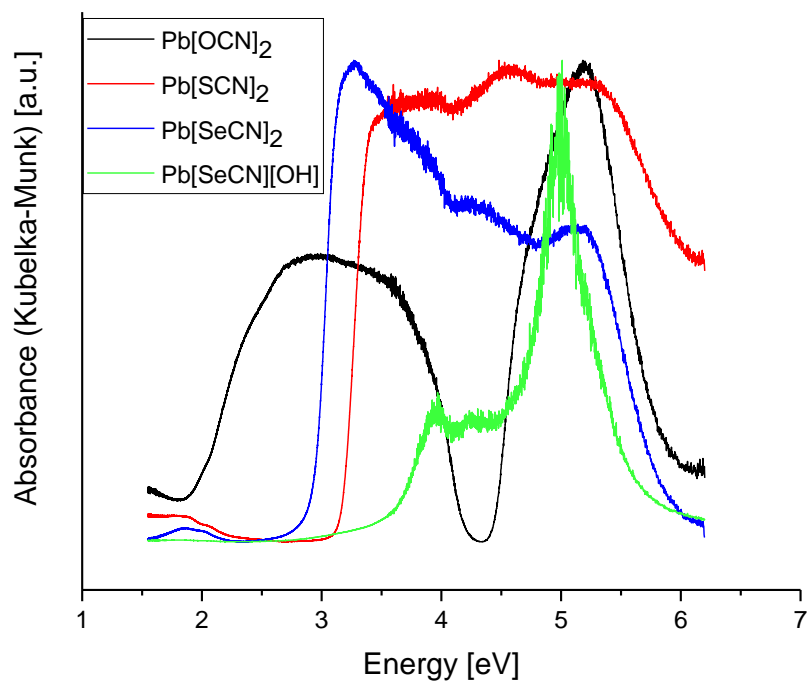

**Figure S6:** Kubelka-Munk plots of Pb[OCN]<sub>2</sub>, Pb[SCN]<sub>2</sub>, Pb[SeCN]<sub>2</sub> and Pb[SeCN][OH].
